# Supplementary material for: Preparation and antibacterial study of waterborne polyurethane modified with lysine and quaternary ammonium salt
Source: Royal Society of Chemistry journal article supplement (doi:10.1039/d3nj01200j), 2023-01-01
Supplement: d3nj01200j1.pdf [file d3nj01200j1.pdf]

## *Supporting Information*

### **Preparation and Antibacterial Study of Waterborne Polyurethane Modified with Lysine and Quaternary Ammonium Salt**

Mengting Xu<sup>a</sup>, Yu Wang<sup>b, \*</sup>, Jichao Shi<sup>a</sup>, Dandan Wu<sup>a</sup>, Lin Lin<sup>c</sup>, Runping Jia<sup>a, \*</sup>, Yinghao Zhai<sup>d</sup>, Hongxiang Qian<sup>d</sup>

<sup>a</sup> *School of Materials Science and Engineering, Shanghai Institute of Technology, Shanghai 201418, China.*

<sup>b</sup> *Yuang Water-based New Material Technology Co., LTD, Shanghai 201306, China.*

<sup>c</sup> *School of Chemical and Environmental Engineering, Shanghai Institute of Technology, Shanghai 201418, China.*

<sup>d</sup> *Research and Development Department, Shanghai Huide Science & Technology Co., Ltd, Shanghai 201512, China.*

\* Corresponding author.

\* *E-mail:* [jiarp@sit.edu.cn](mailto:jiarp@sit.edu.cn) (R. Jia); [yuking@unipolymer.com](mailto:yuking@unipolymer.com) (Y. Wang)

Table S1 The inhibition zones of the WPU, WPU-K, WKPU0 and WKPU against *E. coli* and *S. aureus*.

| Samples | Pristine (mm)  |                  | Mean (mm)      |                  |
|---------|----------------|------------------|----------------|------------------|
|         | <i>E. coli</i> | <i>S. aureus</i> | <i>E. coli</i> | <i>S. aureus</i> |
| WPU     | 0              | 0                | 0              | 0                |
|         | 8.1            | 9.2              |                |                  |
| WPU-K   | 8.5            | 9.9              | 8.4 ± 0.3      | 9.7 ± 0.4        |
|         | 8.6            | 10               |                |                  |
|         | 8.1            | 8.9              |                |                  |
| WKPU0   | 8.2            | 9.6              | 8.3 ± 0.3      | 9.5 ± 0.5        |
|         | 8.6            | 10.0             |                |                  |
|         | 11.5           | 13.4             |                |                  |
| WKPU1   | 12.3           | 12.2             | 12.0 ± 0.4     | 12.7 ± 0.6       |
|         | 11.8           | 12.5             |                |                  |
|         | 15.3           | 15.3             |                |                  |
| WKPU3   | 14.2           | 14.2             | 14.5 ± 0.7     | 14.8 ± 0.5       |
|         | 14.0           | 14.9             |                |                  |
|         | 16.9           | 18.0             |                |                  |
| WKPU5   | 17.3           | 17.9             | 17.4 ± 0.5     | 18.2 ± 0.4       |
|         | 17.9           | 18.7             |                |                  |
|         | 19.1           | 19.8             |                |                  |
| WKPU7   | 18.8           | 20.0             | 19.2 ± 0.5     | 20.0 ± 0.2       |
|         | 19.7           | 20.2             |                |                  |
|         | 16.4           | 16.5             |                |                  |
| WKPU9   | 16.8           | 16.6             | 16.5 ± 0.3     | 16.8 ± 0.4       |
|         | 16.2           | 17.3             |                |                  |
